# Supplementary material for: Advantages of the falciform ligament separating method in pancreaticoduodenectomy for management of postoperative pancreatic fistula
Source: Research Square preprint supplement (doi:10.21203/rs.3.rs-6531522/v1), 2025-05-12
Supplement: Supplementary file 1 [file 721187286a2cd8f91f4632ef.xlsx]

## Sheet: Table 3
Case No	Type of hemorrhage	Timing of Bleeding	Drain Amylase (IU/L)	Drain Amylase (IU/L)	Drain Amylase (IU/L)	Drain Amylase (IU/L)	Procedure	Mortality
		(POD)	PJ, POD3	HJ, POD3	PJ, POD7	HJ, POD7
1	PSA (GDA stump)	17	1439	690	1261	187	IVR, reoperation	no
2	PSA (GDA stump)	11	5076	171	131600	161	IVR	no
3	Transverse pancreatic artery	9	129	119	N/A(already removed)	N/A(already removed)	IVR	no
4	Transverse pancreatic artery	1	7151	973	N/A	N/A	IVR	no
5	Inappropriate hemostat (GDA)	21	335	170	17	5	IVR	yes
6	Inappropriate hemostat (Jejunal artery)	4	767	30	211	9	IVR	no
7	Sentinel bleeding (unknown origin)	10	287	135	26	N/A(already removed)	IVR	no
8	Sentinel bleeding (unknown origin)	6	234300	1756	91388	44	IVR	no
Note:Bolded letters are those that meet the criteria for pancreatic fistula Abbreviations: POD, postoperative day; PJ, pancreaticojejunostomy; HJ, hepaticojejunostomy; GDA, gastroduodenal artery; PSA, pseudoaneurysm; IVR, interventional radiology; PPH, postpancreatectomy hemorrhage; N/A, not available
